# Supplementary material
Source: publisher figshare collection journal article supplement (https://tandf.figshare.com/articles/dataset/_/24969968)
Supplement: Supplementary file 1 [file 1]

# Supplementary Materials for Competing Risk Modeling with Bivariate Varying Coefficients to Understand the Dynamic Impact of COVID-19

Wenbo Wu, John D. Kalbfleisch, Jeremy M. G. Taylor, Jian Kang, Kevin He

## Appendix A Gradient and Hessian of $\ell_{jg}(\boldsymbol{\gamma}_j, \boldsymbol{\theta}_j)$

For  $g = 1, \dots, G$ ,  $i = 1, \dots, n_g$ , and  $j = 1, \dots, m$ , we define

$$S_{jgi}^{(u)}(\boldsymbol{\gamma}_j, \boldsymbol{\theta}_j, X_{gi}) := \sum_{r \in R_g(X_{gi})} \exp\{\mathbf{L}_{gr}^\top(X_{gi})\boldsymbol{\gamma}_j + \mathbf{W}_{gr}^\top \boldsymbol{\theta}_j\} \left[ \begin{matrix} \mathbf{L}_{gr}(X_{gi}) \\ \mathbf{W}_{gr} \end{matrix} \right]^{\odot u}, \quad u = 0, 1, 2,$$

where  $\mathbf{L}_{gr}(X_{gi}) := \mathbf{Z}_{gr} \otimes \check{\mathbf{B}}(\check{X}_{gr}) \otimes \mathbf{B}(X_{gi})$ , and for a vector  $\mathbf{v} \in \mathbb{R}^p$ ,  $\mathbf{v}^{\odot 0} := 1$ ,  $\mathbf{v}^{\odot 1} := \mathbf{v}$ , and  $\mathbf{v}^{\odot 2} := \mathbf{v}\mathbf{v}^\top$ . The gradient  $\dot{\ell}_{jg}(\boldsymbol{\gamma}_j, \boldsymbol{\theta}_j)$  and Hessian  $\ddot{\ell}_{jg}(\boldsymbol{\gamma}_j, \boldsymbol{\theta}_j)$  of  $\ell_{jg}(\boldsymbol{\gamma}_j, \boldsymbol{\theta}_j)$  are hence given by

$$\dot{\ell}_{jg}(\boldsymbol{\gamma}_j, \boldsymbol{\theta}_j) = \sum_{i=1}^{n_g} \Delta_{jgi} \left\{ \left[ \begin{matrix} \mathbf{L}_{gi}(X_{gi}) \\ \mathbf{W}_{gi} \end{matrix} \right] - \mathbf{U}_{jgi}^{(1)}(\boldsymbol{\gamma}_j, \boldsymbol{\theta}_j, X_{gi}) \right\}, \quad (1)$$

$$\ddot{\ell}_{jg}(\boldsymbol{\gamma}_j, \boldsymbol{\theta}_j) = - \sum_{i=1}^{n_g} \Delta_{jgi} \mathbf{V}_{jgi}(\boldsymbol{\gamma}_j, \boldsymbol{\theta}_j, X_{gi}), \quad (2)$$

in which

$$\begin{aligned} \mathbf{U}_{jgi}^{(w)}(\boldsymbol{\gamma}_j, \boldsymbol{\theta}_j, X_{gi}) &:= \frac{S_{jgi}^{(w)}(\boldsymbol{\gamma}_j, \boldsymbol{\theta}_j, X_{gi})}{S_{jgi}^{(0)}(\boldsymbol{\gamma}_j, \boldsymbol{\theta}_j, X_{gi})}, \quad w = 1, 2, \\ \mathbf{V}_{jgi}(\boldsymbol{\gamma}_j, \boldsymbol{\theta}_j, X_{gi}) &:= \mathbf{U}_{jgi}^{(2)}(\boldsymbol{\gamma}_j, \boldsymbol{\theta}_j, X_{gi}) - \{\mathbf{U}_{jgi}^{(1)}(\boldsymbol{\gamma}_j, \boldsymbol{\theta}_j, X_{gi})\}^{\odot 2}. \end{aligned}$$

## Appendix B Tensor-Product Proximal Newton Algorithm

Let  $X_{jg1} < \dots < X_{jgn_{jg}}$  denote the  $n_{jg}$  distinct times of type  $j$  failures within stratum  $g$ . For failure time  $X_{jgb}$ ,  $b = 1, \dots, n_{jg}$ , let  $\mathbf{Z}_{jgb}$ ,  $\mathbf{W}_{jgb}$ , and  $\check{X}_{jgb}$  denote  $\mathbf{Z}_{gi}$ ,  $\mathbf{W}_{gi}$ , and  $\check{X}_{gi}$ , respectively, such that  $\Delta_{jgi} = 1$  and  $X_{gi} = X_{jgb}$ . The tensor-product proximal Newton algorithm is outlined as Algorithm 1. Readers are referred to [Wu et al. \(2022\)](#) for theoretical arguments justifying the convergence of the algorithm. In the algorithm,  $\xi$  is used to control the modified Hessian in Line 18; a large value of  $10^8$  is used as default since it leads to a slight modification of the Hessian. The parameter  $\delta$  is used to control the expansion of the

series of  $\xi$  across iterations. By default, 1 is used, indicating that  $\xi$  remains constant across iterations. One may consider any value greater than 1 to obtain an increasing sequence of  $\xi$  so that the modification to the Hessian is shrinking. The parameter  $\epsilon$  indicates the tolerance level with respect to the squared Newton increment  $\eta^2$ , with  $10^{-10}$  as the default.

---

**Algorithm 1:** Tensor-Product Proximal Newton

---

```

1 for  $j \leftarrow 1$  to  $m$  do //  $m$  failure types
2   initialize  $s \leftarrow 0$ ,  $\xi_s > 0$ ,  $\gamma_j^{(s)} = \mathbf{0}$ , and  $\theta_j^{(s)} = \mathbf{0}$ ;
3   set  $\phi \in (0, 0.5)$ ,  $\psi \in (0.5, 1)$ ,  $\delta \geq 1$  and  $\epsilon > 0$ ;
4   do
5     for  $g \leftarrow 1$  to  $G$  do //  $G$  distinct strata
6       for  $b \leftarrow 1$  to  $n_{jg}$  do //  $n_{jg}$  distinct failure times
7         for  $u \leftarrow 0$  to 2 do
8            $S_{jgb}^{(u)}(\gamma_j^{(s)}, \theta_j^{(s)}, X_{jgb}) = \sum_{r \in R_g(X_{jgb})} \exp\{\mathbf{L}_{gr}^\top(X_{jgb})\gamma_j^{(s)} + \mathbf{W}_{gr}^\top\theta_j^{(s)}\} \left[ \frac{\mathbf{L}_{gr}(X_{jgb})}{\mathbf{W}_{gr}} \right]^{\odot u}$ ;
9         end
10        for  $w \leftarrow 1$  to 2 do
11           $\mathbf{U}_{jgb}^{(w)}(\gamma_j^{(s)}, \theta_j^{(s)}, X_{jgb}) = S_{jgb}^{(w)}(\gamma_j^{(s)}, \theta_j^{(s)}, X_{jgb}) / S_{jgb}^{(0)}(\gamma_j^{(s)}, \theta_j^{(s)}, X_{jgb})$ ;
12        end
13         $\mathbf{V}_{jgb}(\gamma_j^{(s)}, \theta_j^{(s)}, X_{jgb}) = \mathbf{U}_{jgb}^{(2)}(\gamma_j^{(s)}, \theta_j^{(s)}, X_{jgb}) - [\mathbf{U}_{jgb}^{(1)}(\gamma_j^{(s)}, \theta_j^{(s)}, X_{jgb})]^{\odot 2}$ ;
14      end
15    end
16     $\dot{\ell}_j(\gamma_j^{(s)}, \theta_j^{(s)}) = \sum_{g=1}^G \sum_{q=1}^{n_j} \left\{ \left[ \frac{\mathbf{L}_{jgb}(X_{jgb})}{\mathbf{W}_{jgb}} \right] - \mathbf{U}_{jgb}^{(1)}(\gamma_j^{(s)}, \theta_j^{(s)}, X_{jgb}) \right\}$ ;
17     $\ddot{\ell}_j(\gamma_j^{(s)}, \theta_j^{(s)}) = - \sum_{g=1}^G \sum_{q=1}^{n_j} \mathbf{V}_{jgb}(\gamma_j^{(s)}, \theta_j^{(s)}, X_{jgb})$ ;
18     $\begin{bmatrix} \Delta\gamma_j^{(s)} \\ \Delta\theta_j^{(s)} \end{bmatrix} = [\mathbf{Q}_j(\mu_j, \check{\mu}_j) + n\mathbf{I}/\xi_s - \ddot{\ell}_j(\gamma_j^{(s)}, \theta_j^{(s)})]^{-1} \left\{ \dot{\ell}_j(\gamma_j^{(s)}, \theta_j^{(s)}) - \mathbf{Q}_j(\mu_j, \check{\mu}_j) \begin{bmatrix} \gamma_j^{(s)} \\ \theta_j^{(s)} \end{bmatrix} \right\}$ ; // Newton step
19     $\eta^2 = n^{-1} \left\{ \dot{\ell}_j(\gamma_j^{(s)}, \theta_j^{(s)}) - \mathbf{Q}_j(\mu_j, \check{\mu}_j) \begin{bmatrix} \gamma_j^{(s)} \\ \theta_j^{(s)} \end{bmatrix} \right\}^\top \begin{bmatrix} \Delta\gamma_j^{(s)} \\ \Delta\theta_j^{(s)} \end{bmatrix}$ ; //  $\eta$ : Newton increment
20     $\nu \leftarrow 1$ ;
21    while  $\ell_j^{(P)}(\gamma_j^{(s)} + \nu\Delta\gamma_j^{(s)}, \theta_j^{(s)} + \nu\Delta\theta_j^{(s)}; \mu_j, \check{\mu}_j) < \ell_j^{(P)}(\gamma_j^{(s)}, \theta_j^{(s)}; \mu_j, \check{\mu}_j) + n\phi\nu\eta^2$  do  $\nu \leftarrow \psi\nu$ ;
22     $\gamma_j^{(s+1)} = \gamma_j^{(s)} + \nu\Delta\gamma_j^{(s)}$ ;
23     $\theta_j^{(s+1)} = \theta_j^{(s)} + \nu\Delta\theta_j^{(s)}$ ;
24     $\xi_{s+1} = \delta\xi_s$ ;
25     $s \leftarrow s + 1$ ;
26  while  $\eta^2 \geq 2\epsilon$ ;
27 end
```

---

## Appendix C Proof of Proposition 1

**Proposition 1.** Under  $H_0^{(t)} : \mathbf{C}^{(t)} \text{vec}(\gamma_{jl}^\top) = \mathbf{0}$ , the test statistic

$$\{\text{vec}(\tilde{\gamma}_{jl}^\top) - \tilde{\mathbf{b}}_{jl}\}^\top \{\mathbf{C}^{(t)}\}^\top [\mathbf{C}^{(t)} \boldsymbol{\Omega}_{jl} \{\mathbf{C}^{(t)}\}^\top]^{-1} \mathbf{C}^{(t)} \{\text{vec}(\tilde{\gamma}_{jl}^\top) - \tilde{\mathbf{b}}_{jl}\}$$

asymptotically follows a distribution characterized by

$$\sum_{u=1}^{K\check{K} \times K\check{K}} \mu_u G_u^2,$$

where  $G_u$ 's are independent standard normal random variables, and  $\mu_u$ 's are the possibly identical eigenvalues of the matrix product of  $[\mathbf{C}^{(t)}\boldsymbol{\Omega}_{jl}\{\mathbf{C}^{(t)}\}^\top]^{-1}$  and the variance of  $\mathbf{C}^{(t)}\{\text{vec}(\tilde{\boldsymbol{\gamma}}_{jl}^\top) - \tilde{\mathbf{b}}_{jl}\}$ .

*Proof.* Let  $\mathbf{M} := [\mathbf{C}^{(t)}\boldsymbol{\Omega}_{jl}\{\mathbf{C}^{(t)}\}^\top]^{-1}$ , let  $\boldsymbol{\Sigma}$  denote the variance of  $\mathbf{x} := \mathbf{C}^{(t)}\{\text{vec}(\tilde{\boldsymbol{\gamma}}_{jl}^\top) - \tilde{\mathbf{b}}_{jl}\}$ , and let  $Q := \mathbf{x}^\top \mathbf{M} \mathbf{x}$  denote the Wald test statistic. Since  $\boldsymbol{\Sigma}$  is orthogonally diagonalizable, there exists an orthogonal matrix  $\mathbf{P}$  such that  $\mathbf{P}\boldsymbol{\Sigma}\mathbf{P}^\top = \boldsymbol{\Psi}$ , with  $\boldsymbol{\Psi}$  being a diagonal matrix of positive eigenvalues of  $\boldsymbol{\Sigma}$ . Let  $\mathbf{R} := \boldsymbol{\Psi}^{-1/2}\mathbf{P}$ , a nonsingular matrix. Then  $\mathbf{R}\boldsymbol{\Sigma}\mathbf{R}^\top = \mathbf{I}$ . Since  $(\mathbf{R}^\top)^{-1}\mathbf{M}\mathbf{R}^{-1}$  is symmetric and orthogonally diagonalizable, there exists another orthogonal matrix  $\mathbf{T}$  such that  $\mathbf{T}(\mathbf{R}^\top)^{-1}\mathbf{M}\mathbf{R}^{-1}\mathbf{T}^\top = \boldsymbol{\Phi}$  is a diagonal matrix sharing the same eigenvalues  $\mu_1, \dots, \mu_{K\check{K} \times K\check{K}}$  as those of  $(\mathbf{R}^\top)^{-1}\mathbf{M}\mathbf{R}^{-1}$ . Let  $\mathbf{z} := \mathbf{T}\mathbf{R}\mathbf{x}$ . Then under the null  $H_0^{(t)}$ , we have  $\mathbf{z} \sim \mathcal{N}(\mathbf{0}, \mathbf{I})$ . Since  $\mathbf{T}\mathbf{R}$  is nonsingular,  $\mathbf{x} = \mathbf{R}^{-1}\mathbf{T}^\top\mathbf{z}$ . It follows that  $Q = \mathbf{z}^\top \boldsymbol{\Phi} \mathbf{z} = \sum_{u=1}^{K\check{K} \times K\check{K}} \mu_u G_u^2$ , where  $G_u$ 's independently follow the standard normal distribution. Observe that

$$(\mathbf{R}^\top \mathbf{T}^\top)^{-1} \mathbf{M} \boldsymbol{\Sigma} \mathbf{R}^\top \mathbf{T}^\top = \mathbf{T}(\mathbf{R}^\top)^{-1} \mathbf{M} \boldsymbol{\Sigma} \mathbf{R}^\top \mathbf{T}^\top = \mathbf{T}(\mathbf{R}^\top)^{-1} \mathbf{M} \mathbf{R}^{-1} \mathbf{T}^\top = \boldsymbol{\Phi}.$$

This implies that  $\mathbf{M}\boldsymbol{\Sigma}$  and  $\boldsymbol{\Phi}$  have the same set of eigenvalues (since the mapping  $\mathbf{A} \mapsto \mathbf{B}^{-1}\mathbf{A}\mathbf{B}$  preserves eigenvalues).  $\square$

## Appendix D Test of Significance

In addition to tests of coefficient variation, a Wald statistic for the test of significance can be derived. Following the notation in Section 2.2, one may consider the null hypothesis  $H_0 : \mathbf{C}\boldsymbol{\beta}_j(t, \check{x}) = \mathbf{0}$ , in which  $\mathbf{C}$  is a given  $c \times p$  contrast matrix. Note that  $H_0$  can be rewritten as  $[\mathbf{C} \otimes \check{\mathbf{B}}^\top(\check{x}) \otimes \mathbf{B}^\top(t)]\boldsymbol{\gamma}_j = \mathbf{0}$ , where  $\boldsymbol{\gamma}_j = \text{vec}(\boldsymbol{\Gamma}_j^\top)$  with  $\boldsymbol{\Gamma}_j = [\text{vec}(\boldsymbol{\gamma}_{j1}^\top), \dots, \text{vec}(\boldsymbol{\gamma}_{jp}^\top)]^\top$ . The test statistic is thus given by

$$\{\tilde{\boldsymbol{\gamma}}_j - \hat{\mathbf{b}}_j\}^\top [\mathbf{C}^\top \otimes \check{\mathbf{B}}(\check{x}) \otimes \mathbf{B}(t)] \{[\mathbf{C} \otimes \check{\mathbf{B}}^\top(\check{x}) \otimes \mathbf{B}^\top(t)]\boldsymbol{\Omega}_j[\mathbf{C}^\top \otimes \check{\mathbf{B}}(\check{x}) \otimes \mathbf{B}(t)]\}^{-1} [\mathbf{C} \otimes \check{\mathbf{B}}^\top(\check{x}) \otimes \mathbf{B}^\top(t)] \{\tilde{\boldsymbol{\gamma}}_j - \hat{\mathbf{b}}_j\},$$

where  $\boldsymbol{\Omega}_j$  denotes an arbitrary  $pK\check{K} \times pK\check{K}$  symmetric and positive-definite matrix, e.g., the top-left  $pK\check{K} \times pK\check{K}$  block of  $\tilde{\mathbf{V}}_j^S$  or  $\tilde{\mathbf{V}}_j^M$ , and  $\hat{\mathbf{b}}_j$  is a subvector of  $\tilde{\mathbf{b}}_j$  consisting of the first  $pK\check{K}$  rows of  $\tilde{\mathbf{b}}_j$ . The asymptotic distribution of the test statistic can be determined following Proposition 1. That is, the test statistic asymptotically follows a distribution characterized by

$$\sum_{u=1}^c \mu_u G_u^2,$$

where  $G_u$ 's are independent standard normal random variables, and  $\mu_u$ 's are the possibly identical eigenvalues of the matrix product of  $\{[\mathbf{C} \otimes \check{\mathbf{B}}^\top(\check{x}) \otimes \mathbf{B}^\top(t)]\boldsymbol{\Omega}_j[\mathbf{C}^\top \otimes \check{\mathbf{B}}(\check{x}) \otimes \mathbf{B}(t)]\}^{-1}$  and the variance of  $[\mathbf{C} \otimes \check{\mathbf{B}}^\top(\check{x}) \otimes \mathbf{B}^\top(t)]\{\tilde{\boldsymbol{\gamma}}_j - \hat{\mathbf{b}}_j\}$ .

Based on 1000 simulated data replicates, Web Figure 7 displays a scatter plot of the

probability of rejecting the null hypothesis that  $\beta_1(t, \check{x}) = 0$  versus the true value of  $\beta_1(t, \check{x}) = \sin(3\pi t/4) \exp(-0.5\check{x})$ . As expected, the probability of rejection increases with  $|\beta_1(t, \check{x})|$ . For  $\beta_1(t, \check{x}) = 0$ , the type I error rate is mostly less than 0.05, while for  $|\beta_1(t, \check{x})| > 0.2$ , the statistical power is generally above 0.8.

## Appendix E Proof of Proposition 2

**Proposition 2.** *Let  $\hat{\lambda}_{0jg}(\cdot)$  be the estimated baseline hazard function derived from the unpenalized bivariate varying coefficient model. Let*

$$\tilde{M}_{jgi} := \Delta_{jgi} - \exp(\mathbf{W}_{gi}^\top \tilde{\boldsymbol{\theta}}_j^{-f}) \int_0^{X_{gi}} \exp \left\{ \mathbf{Z}_{gi}^\top \tilde{\boldsymbol{\beta}}_j^{-f}(t, \check{X}_{gi}) \right\} \hat{\lambda}_{0jg}(t) dt$$

be the martingale residual for subject  $i$  in the  $g$ th stratum, where  $\tilde{\boldsymbol{\beta}}_j^{-f}(\cdot, \cdot)$  and  $\tilde{\boldsymbol{\theta}}_j^{-f}$  are the penalized estimates from the corresponding fold  $f$  to which subject  $i$  in the  $g$ th stratum belongs. Then the deviance residual for subject  $i$  in the  $g$ th stratum with respect to the  $j$ th failure type is written as

$$d_{jgi} := \text{sign}(\tilde{M}_{jgi}) \sqrt{-2 \left[ \Delta_{jgi} \left\{ \mathbf{Z}_{gi}^\top \tilde{\boldsymbol{\beta}}_j^{-f}(X_{gi}, \check{X}_{gi}) + \mathbf{W}_{gi}^\top \tilde{\boldsymbol{\theta}}_j^{-f} + \log \int_0^{X_{gi}} \hat{\lambda}_{0jg}(t) dt \right\} + \tilde{M}_{jgi} \right]}.$$

*Proof.* Given estimates  $\hat{\boldsymbol{\theta}}_j, \hat{\boldsymbol{\beta}}_j(\cdot, \cdot)$  for the bivariate varying coefficient model (1), the martingale residuals can be defined as

$$\hat{M}_{jgi} := \hat{M}_{jgi}(\infty, \check{X}_{gi}) = \Delta_{jgi} - \exp(\mathbf{W}_{gi}^\top \hat{\boldsymbol{\theta}}_j) \int_0^{X_{gi}} \exp \left\{ \mathbf{Z}_{gi}^\top \hat{\boldsymbol{\beta}}_j(t, \check{X}_{gi}) \right\} \hat{\lambda}_{0jg}(t) dt,$$

where the baseline hazard estimates  $\hat{\lambda}_{0jg}(\cdot)$  are determined via the Breslow estimator. Further, the log-likelihood with respect to the  $j$ th failure type can be written as

$$\begin{aligned} & \sum_{g=1}^G \sum_{i=1}^{n_g} \{ \Delta_{jgi} \log \lambda_{jgi}(X_{gi} \mid \mathbf{Z}_{gi}, \mathbf{W}_{gi}, \check{X}_{gi}) + \log S_{jgi}(X_{gi} \mid \mathbf{Z}_{gi}, \mathbf{W}_{gi}, \check{X}_{gi}) \} \\ &= \sum_{g=1}^G \sum_{i=1}^{n_g} \left[ \Delta_{jgi} \{ \mathbf{Z}_{gi}^\top \boldsymbol{\beta}_j(X_{gi}, \check{X}_{gi}) + \mathbf{W}_{gi}^\top \boldsymbol{\theta}_j + \log \lambda_{0jg}(X_{gi}) \right. \\ & \quad \left. - \int_0^{X_{gi}} \exp \{ \mathbf{Z}_{gi}^\top \boldsymbol{\beta}_j(t, \check{X}_{gi}) + \mathbf{W}_{gi}^\top \boldsymbol{\theta}_j \} \lambda_{0jg}(t) dt \right], \end{aligned}$$

where  $S_{jgi}(t \mid \mathbf{Z}_{gi}, \mathbf{W}_{gi}, \check{X}_{gi})$  is the corresponding survivor function. Assuming that the

baseline hazard  $\lambda_{0jg}(\cdot)$  is known, we have the deviance  $D$  written as

$$D = 2 \sup_{\boldsymbol{\beta}_{jgi}, \boldsymbol{\theta}_{jgi}} \sum_{g=1}^G \sum_{i=1}^{n_g} \left\{ \Delta_{jgi} [\mathbf{Z}_{gi}^\top \{\boldsymbol{\beta}_{jgi} - \hat{\boldsymbol{\beta}}_j(X_{gi}, \check{X}_{gi})\} + \mathbf{W}_{gi}^\top (\boldsymbol{\theta}_{jgi} - \hat{\boldsymbol{\theta}}_j)] \right. \\ \left. - \int_0^{X_{gi}} \left[ \exp(\mathbf{Z}_{gi}^\top \boldsymbol{\beta}_{jgi} + \mathbf{W}_{gi}^\top \boldsymbol{\theta}_{jgi}) - \exp\{\mathbf{Z}_{gi}^\top \hat{\boldsymbol{\beta}}_j(t, \check{X}_{gi}) + \mathbf{W}_{gi}^\top \hat{\boldsymbol{\theta}}_j\} \right] \lambda_{0jg}(t) dt \right\},$$

where  $\boldsymbol{\beta}_{jgi}$  and  $\boldsymbol{\theta}_{jgi}$  are subject-cause-specific estimates allowed in a saturated model. Now, we have the first order condition

$$\Delta_{jgi} = \exp(\mathbf{Z}_{gi}^\top \boldsymbol{\beta}_{jgi} + \mathbf{W}_{gi}^\top \boldsymbol{\theta}_{jgi}) \int_0^{X_{gi}} \lambda_{0jg}(t) dt, \quad g = 1, \dots, G, i = 1, \dots, n_g.$$

With this condition, the deviance  $D$  reduces to

$$D = -2 \sum_{g=1}^G \sum_{i=1}^{n_g} \left\{ \Delta_{jgi} \log \frac{\exp\{\mathbf{Z}_{gi}^\top \hat{\boldsymbol{\beta}}_j(X_{gi}, \check{X}_{gi}) + \mathbf{W}_{gi}^\top \hat{\boldsymbol{\theta}}_j\} \int_0^{X_{gi}} \lambda_{0jg}(t) dt}{\Delta_{jgi}} + \tilde{M}_{jgi} \right\} \\ = -2 \sum_{g=1}^G \sum_{i=1}^{n_g} \left[ \Delta_{jgi} \left\{ \mathbf{Z}_{gi}^\top \hat{\boldsymbol{\beta}}_j(X_{gi}, \check{X}_{gi}) + \mathbf{W}_{gi}^\top \hat{\boldsymbol{\theta}}_j + \log \int_0^{X_{gi}} \lambda_{0jg}(t) dt \right\} + \tilde{M}_{jgi} \right],$$

where

$$\tilde{M}_{jgi} := \tilde{M}_{jgi}(\infty, \check{X}_{gi}) = \Delta_{jgi} - \exp(\mathbf{W}_{gi}^\top \hat{\boldsymbol{\theta}}_j) \int_0^{X_{gi}} \exp\{\mathbf{Z}_{gi}^\top \hat{\boldsymbol{\beta}}_j(t, \check{X}_{gi})\} \lambda_{0jg}(t) dt$$

is the martingale residual with known baseline hazard  $\lambda_{0jg}(\cdot)$ . Then the deviance residual  $d_{jgi}$  for subject  $i$  in the  $g$ th stratum with respect to the  $j$ th failure type can be written as

$$d_{jgi} = \text{sign}(\hat{M}_{jgi}) \sqrt{-2 \left[ \Delta_{jgi} \left\{ \mathbf{Z}_{gi}^\top \hat{\boldsymbol{\beta}}_j(X_{gi}, \check{X}_{gi}) + \mathbf{W}_{gi}^\top \hat{\boldsymbol{\theta}}_j + \log \int_0^{X_{gi}} \hat{\lambda}_{0jg}(t) dt \right\} + \hat{M}_{jgi} \right]},$$

where  $\hat{M}_{jgi}$  is the martingale residual  $\tilde{M}_{jgi}$  with  $\lambda_{0jg}(\cdot)$  replaced by  $\hat{\lambda}_{0jg}(\cdot)$ .  $\square$

## Appendix F Alternative Cross-Validation Methods

### F.1 Fold-constrained (FC) cross-validated partial likelihood

In this approach, the cross-validation error (CVE) is proportional to the sum of fold-specific log-partial likelihood functions in which risk sets are constrained by the corresponding folds, i.e.,

$$\text{CVE}_j := -2 \sum_{f=1}^F \ell_j^f(\tilde{\boldsymbol{\eta}}_j^{-f}).$$

## F.2 Complementary fold-constrained (CFC) cross-validated partial likelihood

As the name suggests, the CVE is proportional to the sum of complementary fold-constrained log-partial likelihood functions, i.e.,

$$\text{CVE}_j := -2 \sum_{f=1}^F \{\ell_j(\tilde{\boldsymbol{\eta}}_j^{-f}) - \ell_j^{-f}(\tilde{\boldsymbol{\eta}}_j^{-f})\}.$$

This approach was applied in [Verweij and Van Houwelingen \(1993\)](#) and [Simon et al. \(2011\)](#).

## F.3 Unconstrained (UC) cross-validated partial likelihood

First introduced by [Breheny and Huang \(2011\)](#) as cross-validated linear predictors, this approach features risk set construction unconstrained by folds in that fold-specific estimates  $\tilde{\boldsymbol{\eta}}_j^{-f}$ 's are assigned to all units of the sample according to their fold identities. With a slight abuse of notation, the CVE is written as

$$\text{CVE}_j := -2\ell_j(\tilde{\boldsymbol{\eta}}_j^{-1}, \dots, \tilde{\boldsymbol{\eta}}_j^{-F}),$$

where  $\tilde{\boldsymbol{\eta}}_j^{-f}$  is assigned to observations of fold  $f$ .

## F.4 Generalized cross-validation (GCV)

Extending the approach of [Yan and Huang \(2012\)](#) to this setting with bivariate varying coefficients, we can write the CVE for the  $j$ th failure type as

$$\text{CVE}_j = -\frac{\ell_j(\boldsymbol{\eta}_j)}{n(1 - f_j(\boldsymbol{\mu}_j, \check{\boldsymbol{\mu}}_j)/n)^2},$$

where  $f_j(\boldsymbol{\mu}_j, \check{\boldsymbol{\mu}}_j) := \text{trace}\left(\{\check{\ell}_j^{(P)}(\boldsymbol{\eta}_j; \boldsymbol{\mu}_j, \check{\boldsymbol{\mu}}_j)\}^{-1}\check{\ell}_j(\boldsymbol{\eta}_j)\right)$ , i.e., the number of effective parameters ([Yan and Huang, 2012](#)), or the “degrees of freedom” of the model ([Gray, 1992](#)).

## Appendix G Supplementary Figures

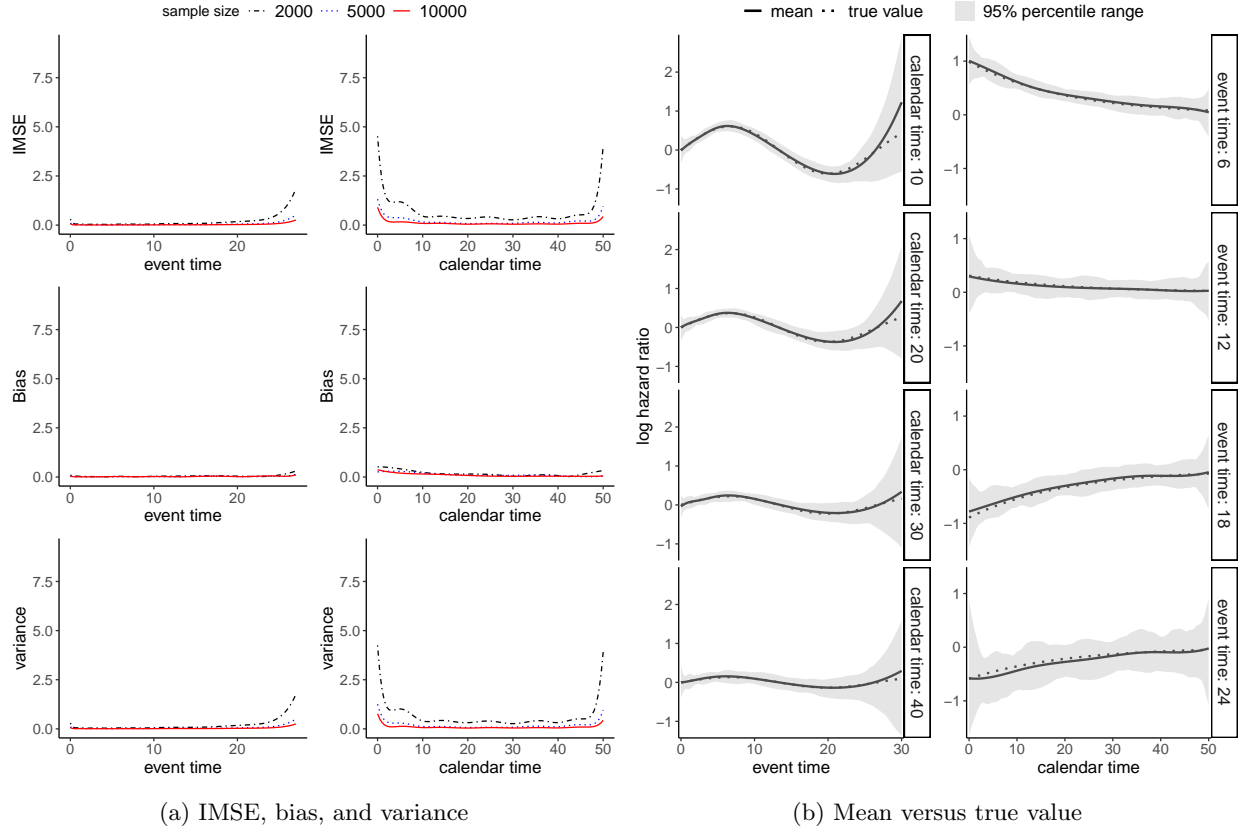

Supplementary Figure 1: (a) Integrated mean squared error (IMSE), average bias, and average variance of the estimated surface  $\hat{\beta}_1(t, \check{x})$  with varied sample sizes on event and calendar timescales. In each scenario, 100 data replicates were generated. On both timescales,  $K = \check{K} = 7$  cubic ( $d = \check{d} = 3$ ) B-spline functions form a basis. True values are  $\beta_1(t, \check{x}) = \sin(3\pi t/4) \exp(-0.5\check{x})$  and  $\beta_2 = 1$ . (b) Mean and 95% percentile range (2.5th and 97.5th percentiles as lower and upper limits) of pointwise estimates of  $\beta_1(t, \check{x})$  at selected event times and calendar times. In each scenario, 100 data replicates were generated with sample size equal to 10,000. On both timescales,  $K = \check{K} = 7$  cubic ( $d = \check{d} = 3$ ) B-spline functions form a basis. True values are  $\beta_1(t, \check{x}) = \sin(3\pi t/4) \exp(-0.5\check{x})$  and  $\beta_2 = 1$ . An unpenalized approach was used in (a) and (b).

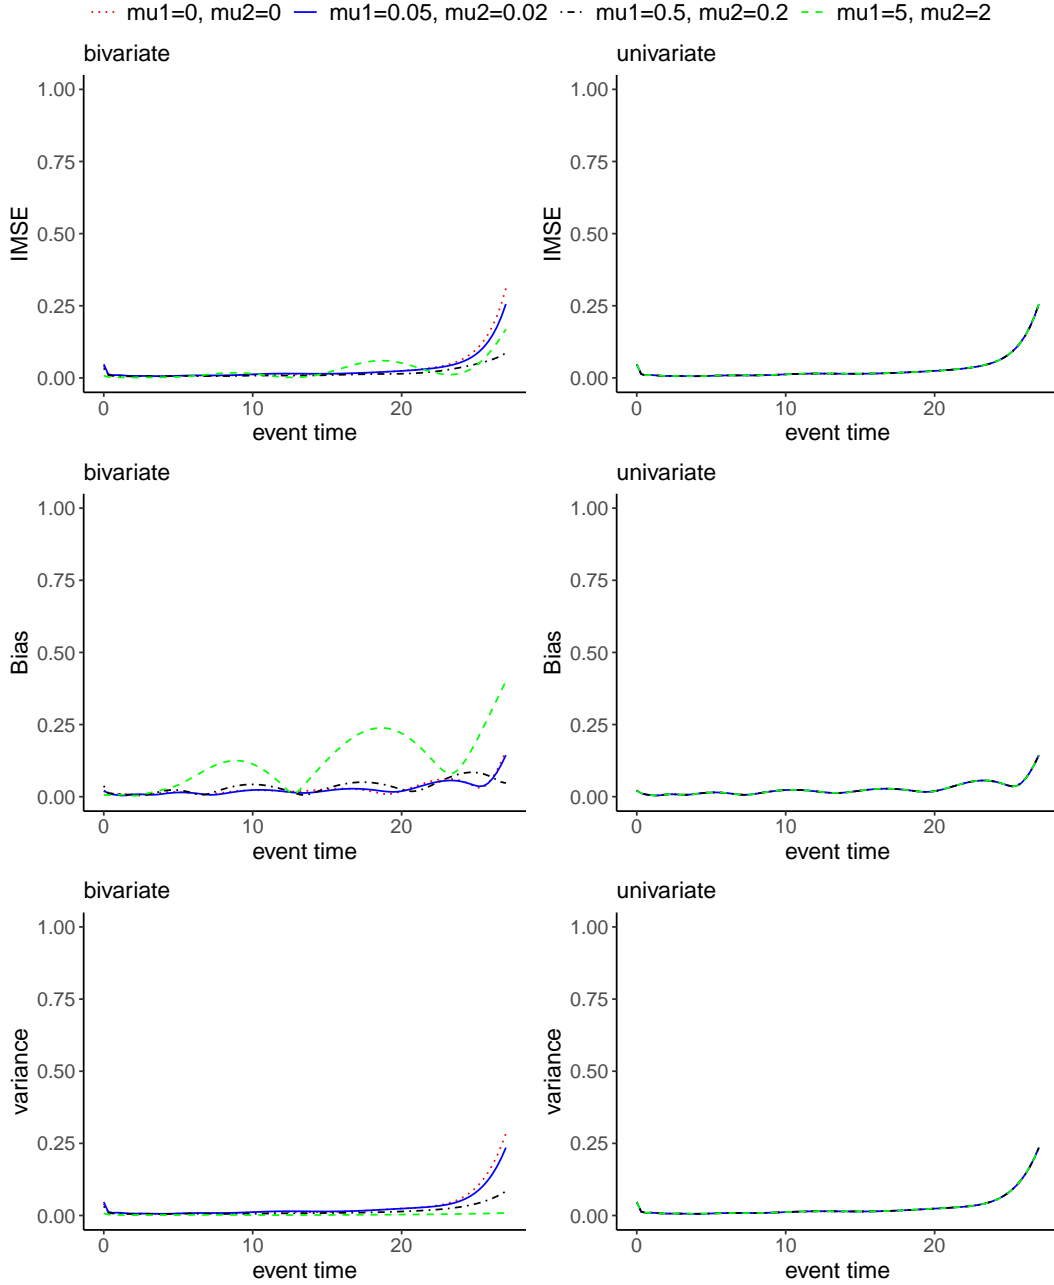

Supplementary Figure 2: Integrated mean squared error (IMSE), average bias, and average variance of the estimated surface  $\hat{\beta}_1(t, \tilde{x})$  across event time with sample size fixed at 10,000. In each scenario, 100 data replicates were generated. On both timescales,  $K = \check{K} = 7$  cubic ( $d = \check{d} = 3$ ) B-spline functions form a basis. True values are  $\beta_1(t, \tilde{x}) = \sin(3\pi t/4) \exp(-0.5\tilde{x})$  and  $\beta_2 = 1$ . Various levels of penalization were introduced to  $\beta_1(\cdot, \cdot)$ , where  $\mu_1$  and  $\mu_2$  denote tuning parameters for calendar and event time, respectively, as in (4) of the manuscript. Both the bivariate varying coefficient model and the univariate time-varying coefficient model (Wu et al., 2022) were considered.



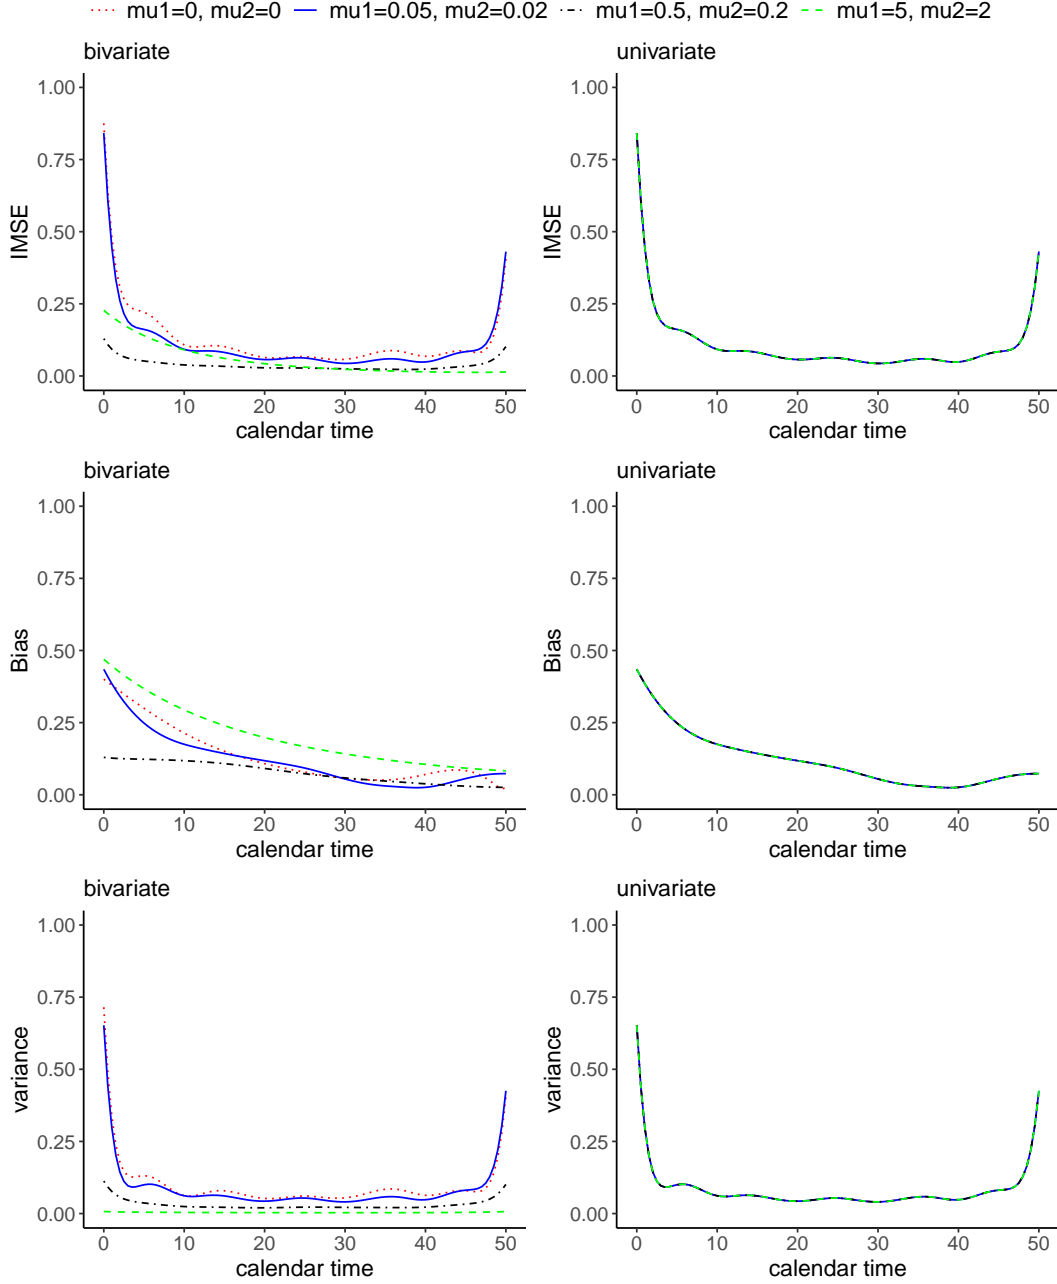

Supplementary Figure 3: Integrated mean squared error (IMSE), average bias, and average variance of the estimated surface  $\hat{\beta}_1(t, \check{x})$  across calendar time with sample size fixed at 10,000. In each scenario, 100 data replicates were generated. On both timescales,  $K = \check{K} = 7$  cubic ( $d = \check{d} = 3$ ) B-spline functions form a basis. True values are  $\beta_1(t, \check{x}) = \sin(3\pi t/4) \exp(-0.5\check{x})$  and  $\beta_2 = 1$ . Various levels of penalization were introduced to  $\beta_1(\cdot, \cdot)$ , where  $\mu_1$  and  $\mu_2$  denote tuning parameters for calendar and event time, respectively, as in (4) of the manuscript. Both the bivariate varying coefficient model and the univariate time-varying coefficient model (Wu et al., 2022) were considered. In the latter model, the estimated coefficient was constant across calendar time.

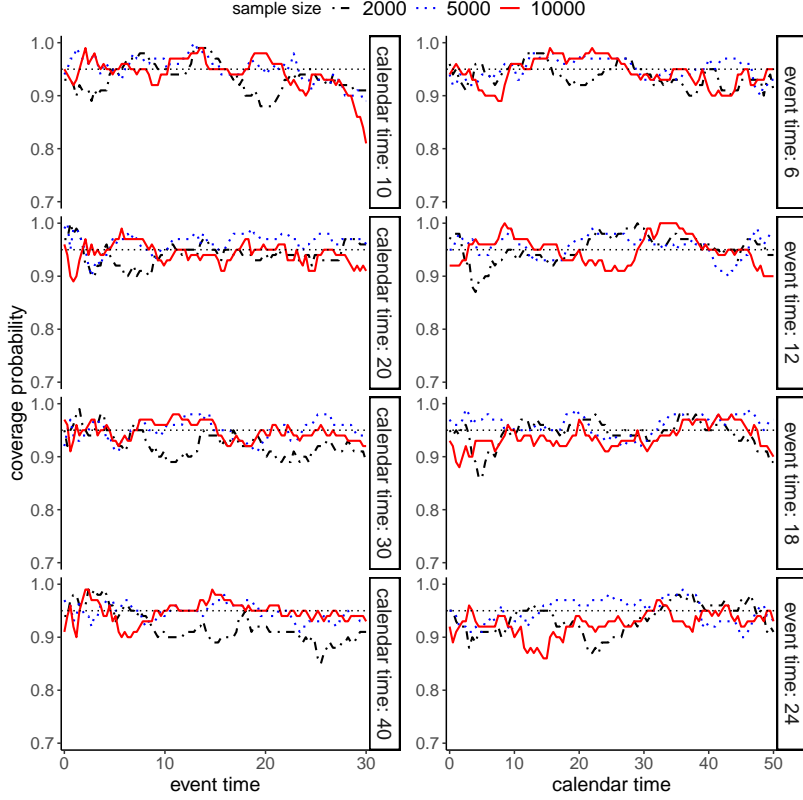

(a) Coverage probability

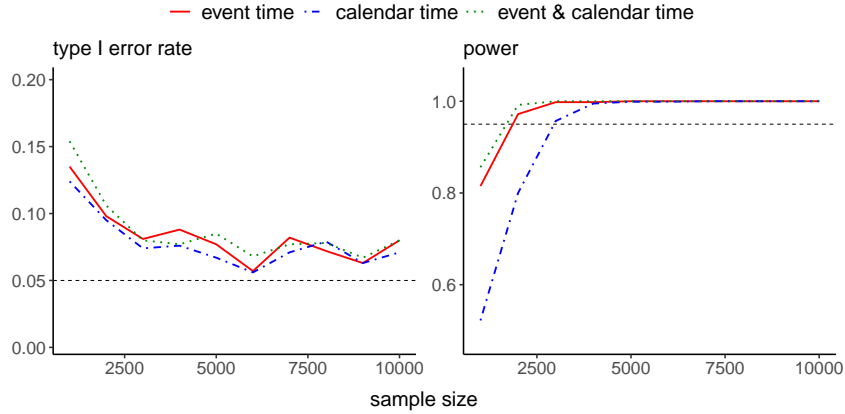

(b) Type I error rate and power

Supplementary Figure 4: (a) Coverage probability curves of  $\beta_1(t, \tilde{x})$  via pointwise 95% confidence intervals on event and calendar time scales, with varied sample sizes. In each scenario, 100 data replicates were generated with sample size equal to 10,000. On both timescales,  $K = \tilde{K} = 7$  cubic ( $d = \tilde{d} = 3$ ) B-spline functions form a basis. True values are  $\beta_1(t, \tilde{x}) = \sin(3\pi t/4) \exp(-0.5\tilde{x})$  and  $\beta_2 = 1$ . (b) Type I error rate and power curves for tests of univariate and bivariate variation with varied sample sizes. In each scenario, 1,000 data replicates were generated. On both timescales,  $K = \tilde{K} = 7$  cubic ( $d = \tilde{d} = 3$ ) B-spline functions form a basis. True values are  $\beta_1(t, \tilde{x}) = 1$  and  $\beta_2 = 1$  in the left panel, and  $\beta_1(t, \tilde{x}) = \sin(3\pi t/4) \exp(-0.5\tilde{x})$  and  $\beta_2 = 1$  in the right panel. An unpenalized approach was used in (a) and (b).

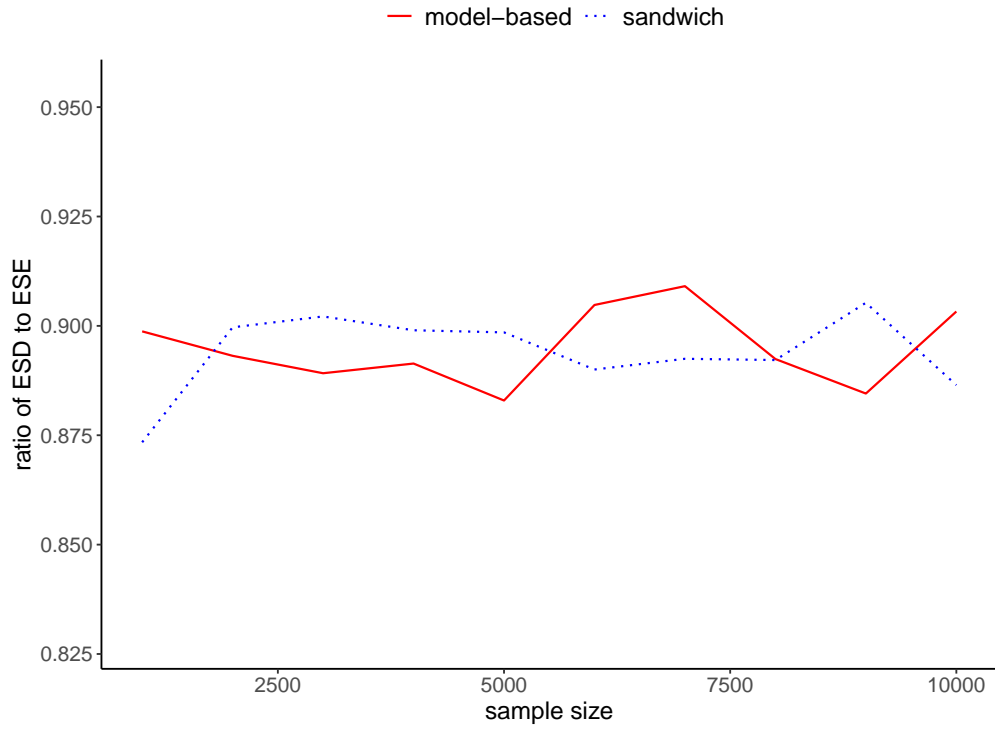

Supplementary Figure 5: The ratio of the empirical standard deviation to the estimated standard error for  $\beta_1(t, \check{x})$  averaged across grid points. In each scenario, 1,000 data replicates were generated. True values are  $\beta_1(t, \check{x}) = 0.5$  and  $\beta_2 = 1$ . A sandwich and a model-based variance estimator were used. Throughout all experiments, 7 cubic B-splines form a basis on both timescales, and tuning parameters vary with sample size, i.e.,  $\mu = n^{1/8}/500$  and  $\check{\mu} = n^{1/8}/200$ .

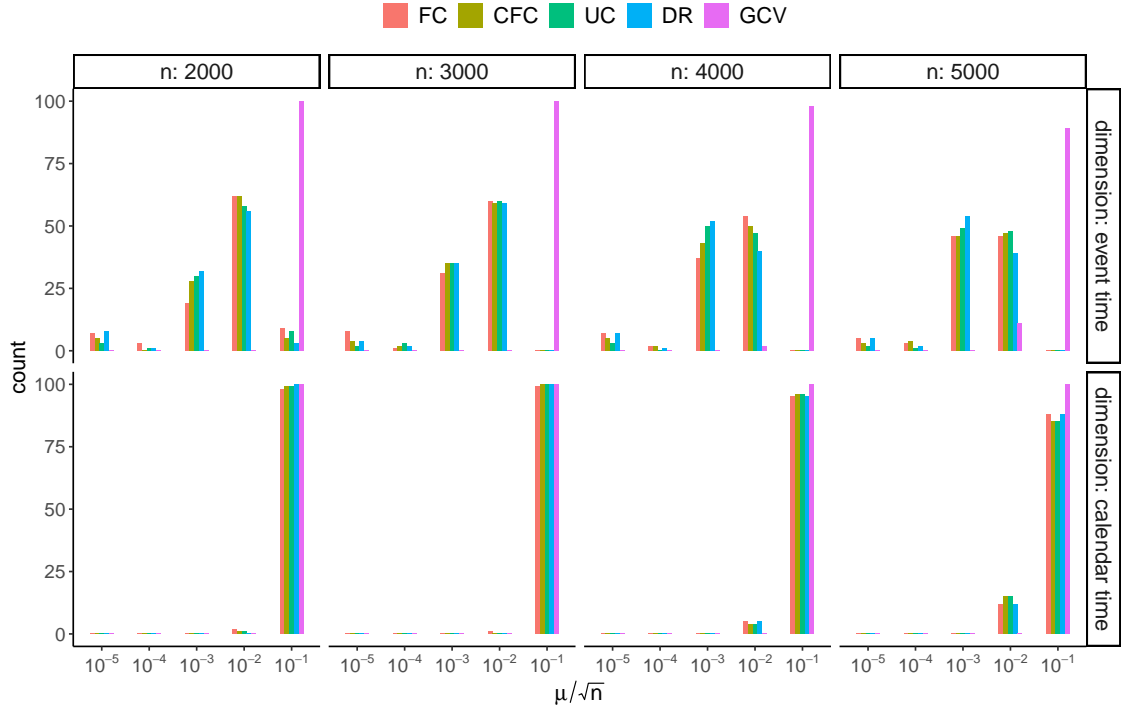

Supplementary Figure 6: A comparison of the distribution of selected tuning parameters for five cross-validation methods: fold-constrained (FC), complementary fold-constrained (CFC), and fold-unconstrained (UC) cross-validated partial likelihood, cross-validated deviance residuals (DR), and generalized cross-validation (GCV). In each scenario, 100 training and validation data replicates were generated independently. A 5-by-5 grid of tuning parameters was formed such that  $\mu/\sqrt{n}$  (with  $n$  denoting sample size) and  $\check{\mu}/\sqrt{n}$  varied from  $10^{-5}$  to  $10^{-1}$ . Each cross-validation method was applied to a training data replicate to determine the optimal tuning parameters. True values were  $\beta_1(t, \check{x}) = \sin(3\pi t/4) \exp(-0.5\check{x})$  and  $\beta_2(t, \check{x}) = 1$ .

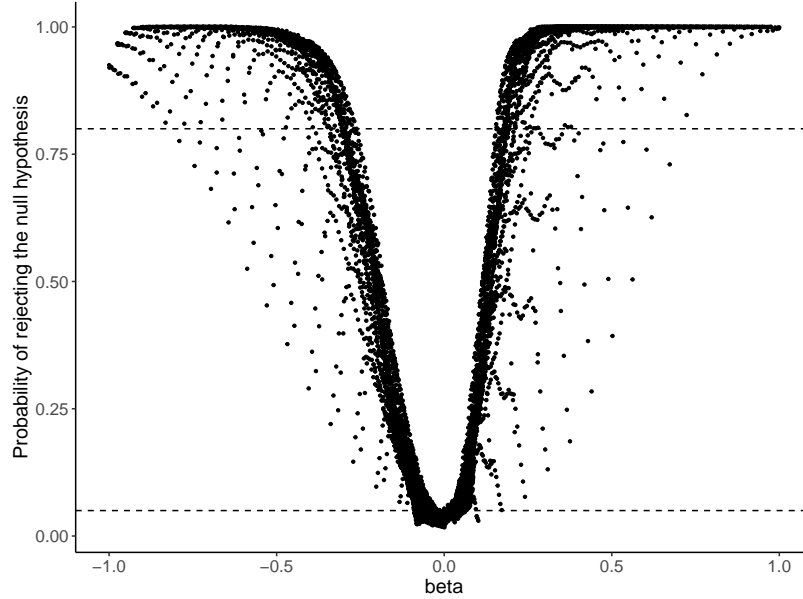

Supplementary Figure 7: A scatter plot of the probability of rejecting the null hypothesis that  $\beta_1(t, \check{x}) = 0$  versus the true value of  $\beta_1(t, \check{x}) = \sin(3\pi t/4) \exp(-0.5\check{x})$ . In the experiment, 1000 data replicates were generated with sample size  $n = 10,000$  and  $\beta_2 = 1$ , and 7 cubic B-splines were used to form a basis on both timescales. A sandwich variance estimator was used with test statistics approximately following a chi-squared distribution. Tuning parameters were set as  $\mu_1=0.5$  and  $\mu_1=0.2$ . Two dashed horizontal lines correspond to 0.05 and 0.8, respectively.

## Appendix H Supplementary Table

### References

- Breheny, P. and Huang, J. (2011). Coordinate descent algorithms for nonconvex penalized regression, with applications to biological feature selection. *Annals of Applied Statistics*, 5(1):232–253.
- Davies, R. B. (1980). Algorithm AS 155: The distribution of a linear combination of  $\chi^2$  random variables. *Journal of the Royal Statistical Society: Series C (Applied Statistics)*, 29(3):323–333.
- Gray, R. J. (1992). Flexible methods for analyzing survival data using splines, with applications to breast cancer prognosis. *Journal of the American Statistical Association*, 87(420):942–951.
- Simon, N., Friedman, J., Hastie, T., and Tibshirani, R. (2011). Regularization paths for Cox’s proportional hazards model via coordinate descent. *Journal of Statistical Software*, 39(5):1–13.
- Verweij, P. J. and Van Houwelingen, H. C. (1993). Cross-validation in survival analysis. *Statistics in Medicine*, 12(24):2305–2314.

Table 1: Type I error rate and power for tests of univariate and bivariate variation with different test statistics and varied sample sizes. In each scenario, 1,000 data replicates were generated. True values are  $\beta_1(t, \check{x}) = \sin(3\pi t/4)$  and  $\beta_2 = 1$  in Panel A, and  $\beta_1(t, \check{x}) = \exp(-0.5\check{x})$  and  $\beta_2 = 1$  in Panel B. In the first and second columns of each sub-panel, a sandwich and a model-based variance estimator were used with test statistics approximately following a chi-squared distribution. In the third column of each sub-panel, the test statistic in Gray (1992) was compared with a distribution of a linear combination of chi-squared random variables (Davies, 1980). We used 7 cubic B-splines to form a basis on both timescales, and tuning parameters vary with sample size, i.e.,  $\mu = n^{1/8}/500$  and  $\check{\mu} = n^{1/8}/200$ . SC, sandwich estimator with chi-squared distribution; MC, model-based estimator with chi-squared distribution; MD, model-based estimator with a distribution of a linear combination of chi-squared random variables.

| Panel A: $\beta_1(t, \check{x}) = \sin(3\pi t/4)$ |                    |    |    |                                   |       |       |                               |    |       |
|---------------------------------------------------|--------------------|----|----|-----------------------------------|-------|-------|-------------------------------|----|-------|
| sample size                                       | power (event time) |    |    | type I error rate (calendar time) |       |       | power (event & calendar time) |    |       |
|                                                   | SC                 | MC | MD | SC                                | MC    | MD    | SC                            | MC | MD    |
| 1000                                              | 1                  | 1  | 1  | 0.006                             | 0.006 | 0.010 | 1                             | 1  | 0.999 |
| 2000                                              | 1                  | 1  | 1  | 0.006                             | 0.008 | 0.004 | 1                             | 1  | 1     |
| 3000                                              | 1                  | 1  | 1  | 0.003                             | 0.002 | 0.009 | 1                             | 1  | 1     |
| 4000                                              | 1                  | 1  | 1  | 0.004                             | 0.002 | 0.004 | 1                             | 1  | 1     |
| 5000                                              | 1                  | 1  | 1  | 0.007                             | 0.002 | 0.003 | 1                             | 1  | 1     |
| 6000                                              | 1                  | 1  | 1  | 0.003                             | 0.003 | 0.002 | 1                             | 1  | 1     |
| 7000                                              | 1                  | 1  | 1  | 0.002                             | 0.001 | 0.003 | 1                             | 1  | 1     |
| 8000                                              | 1                  | 1  | 1  | 0.006                             | 0.001 | 0.002 | 1                             | 1  | 1     |
| 9000                                              | 1                  | 1  | 1  | 0.001                             | 0.001 | 0.003 | 1                             | 1  | 1     |
| 10000                                             | 1                  | 1  | 1  | 0.002                             | 0.003 | 0.006 | 1                             | 1  | 1     |

  

| Panel B: $\beta_1(t, \check{x}) = \exp(-0.5\check{x})$ |                                |       |       |                       |       |       |                               |       |       |
|--------------------------------------------------------|--------------------------------|-------|-------|-----------------------|-------|-------|-------------------------------|-------|-------|
| sample size                                            | type I error rate (event time) |       |       | power (calendar time) |       |       | power (event & calendar time) |       |       |
|                                                        | SC                             | MC    | MD    | SC                    | MC    | MD    | SC                            | MC    | MD    |
| 1000                                                   | 0.008                          | 0.005 | 0.003 | 0.602                 | 0.58  | 0.59  | 0.596                         | 0.607 | 0.596 |
| 2000                                                   | 0.005                          | 0.009 | 0.005 | 0.974                 | 0.97  | 0.973 | 0.970                         | 0.973 | 0.973 |
| 3000                                                   | 0.001                          | 0.003 | 0.003 | 1                     | 0.999 | 1     | 1                             | 0.997 | 1     |
| 4000                                                   | 0.004                          | 0.004 | 0.003 | 1                     | 1     | 1     | 1                             | 1     | 1     |
| 5000                                                   | 0.004                          | 0.002 | 0.002 | 1                     | 1     | 1     | 1                             | 1     | 1     |
| 6000                                                   | 0.004                          | 0.003 | 0.001 | 1                     | 1     | 1     | 1                             | 1     | 1     |
| 7000                                                   | 0.006                          | 0.004 | 0.002 | 1                     | 1     | 1     | 1                             | 1     | 1     |
| 8000                                                   | 0.001                          | 0.003 | 0.004 | 1                     | 1     | 1     | 1                             | 1     | 1     |
| 9000                                                   | 0.002                          | 0.004 | 0.002 | 1                     | 1     | 1     | 1                             | 1     | 1     |
| 10000                                                  | 0.002                          | 0.002 | 0.005 | 1                     | 1     | 1     | 1                             | 1     | 1     |

- Wu, W., Taylor, J. M., Brouwer, A. F., Luo, L., Kang, J., Jiang, H., and He, K. (2022). Scalable proximal methods for cause-specific hazard modeling with time-varying coefficients. *Lifetime Data Analysis*, 28(2):194–218.
- Yan, J. and Huang, J. (2012). Model selection for Cox models with time-varying coefficients. *Biometrics*, 68(2):419–428.
